# Supplementary material
Source: PubMed Central journal article supplement (PMC3811754)
Supplement: IAI.00506-13_zii999090309so1.pdf [file IAI.00506-13_zii999090309so1.pdf]

**Table S1.** Real time qRT-PCR analysis<sup>a</sup>

| Parameter and gene expressed                         | <i>V. anguillarum</i> strain <sup>b</sup> | Average ( $\pm$ SD <sup>c</sup> )         |                                           |
|------------------------------------------------------|-------------------------------------------|-------------------------------------------|-------------------------------------------|
|                                                      |                                           | Log phase                                 | Stationary phase                          |
| <i>rtxA</i>                                          |                                           |                                           |                                           |
| RNA Copy number                                      | M93sm                                     | $2.66 \times 10^4 (\pm 3.76 \times 10^3)$ | $8.57 \times 10^3 (\pm 3.60 \times 10^2)$ |
|                                                      | <i>hns</i> -                              | $7.75 \times 10^4 (\pm 1.11 \times 10^4)$ | $1.83 \times 10^4 (\pm 2.13 \times 10^3)$ |
|                                                      | <i>hns</i> +                              | $9.72 \times 10^2 (\pm 10)$               | $2.94 \times 10^2 (\pm 19)$               |
|                                                      | <i>hlyU</i> -                             | $2.38 \times 10^2 (\pm 1.38 \times 10^2)$ | $6.02 \times 10^2 (\pm 90)$               |
|                                                      | <i>hns</i> -/ <i>hlyU</i> -               | $6.47 \times 10^4 (\pm 9.92 \times 10^3)$ | $1.23 \times 10^4 (\pm 1.47 \times 10^3)$ |
|                                                      | <i>hns</i> -/ <i>hlyU</i> +               | $1.43 \times 10^5 (\pm 2.00 \times 10^4)$ | $2.13 \times 10^4 (\pm 4.91 \times 10^2)$ |
|                                                      | <i>hns</i> +/ <i>hlyU</i> -               | $1.24 \times 10^4 (\pm 1.75 \times 10^2)$ | $3.74 \times 10^3 (\pm 4.65 \times 10^2)$ |
| Relative change (fold) to M93Sm <sup>d</sup>         | M93Sm                                     | 1.00 ( $\pm 0.14$ )                       | 1.00 ( $\pm 0.04$ )                       |
|                                                      | <i>hns</i> -                              | 2.91 ( $\pm 0.42$ )                       | 2.14 ( $\pm 0.25$ )                       |
|                                                      | <i>hns</i> +                              | -27.37 ( $\pm 0.00$ )                     | -29.15 ( $\pm 0.00$ )                     |
|                                                      | <i>hlyU</i> -                             | -11.18 ( $\pm 0.01$ )                     | -14.23 ( $\pm 0.01$ )                     |
| Relative change (fold) to <i>hlyU</i> - <sup>d</sup> | <i>hlyU</i> -                             | 1.00 ( $\pm 0.06$ )                       | 1.00 ( $\pm 0.15$ )                       |
|                                                      | <i>hns</i> -/ <i>hlyU</i> -               | 27.21 ( $\pm 4.17$ )                      | 20.50 ( $\pm 2.43$ )                      |
|                                                      | <i>hns</i> +/ <i>hlyU</i> -               | 5.22 ( $\pm 0.07$ )                       | 6.22 ( $\pm 0.77$ )                       |
| Relative change (fold) to <i>hns</i> - <sup>d</sup>  | <i>hns</i> -                              | 1.00 ( $\pm 0.14$ )                       | 1.00 ( $\pm 0.12$ )                       |
|                                                      | <i>hns</i> -/ <i>hlyU</i> -               | -1.20 ( $\pm 0.13$ )                      | -1.48 ( $\pm 0.08$ )                      |
|                                                      | <i>hns</i> -/ <i>hlyU</i> +               | 1.84 ( $\pm 0.26$ )                       | 1.16 ( $\pm 0.03$ )                       |
| <i>rtxH</i>                                          |                                           |                                           |                                           |
| RNA Copy number                                      | M93Sm                                     | $6.80 \times 10^4 (\pm 1.80 \times 10^4)$ | $2.45 \times 10^4 (\pm 3.19 \times 10^3)$ |

|                                              |              |                                           |                                           |
|----------------------------------------------|--------------|-------------------------------------------|-------------------------------------------|
|                                              | <i>hns</i> - | $3.10 \times 10^5 (\pm 8.58 \times 10^4)$ | $5.85 \times 10^4 (\pm 3.56 \times 10^3)$ |
|                                              | <i>hns</i> + | $9.43 \times 10^3 (\pm 1.31 \times 10^3)$ | $8.59 \times 10^3 (\pm 6.12 \times 10^2)$ |
| Relative change (fold) to M93Sm <sup>d</sup> | M93Sm        | 1.00 ( $\pm 0.26$ )                       | 1.00 ( $\pm 0.13$ )                       |
|                                              | <i>hns</i> - | 4.56 ( $\pm 1.26$ )                       | 2.39 ( $\pm 0.15$ )                       |
|                                              | <i>hns</i> + | -7.21 ( $\pm 0.02$ )                      | -2.85 ( $\pm 0.02$ )                      |

*rtxB*

|                                                      |                             |                                           |                                           |
|------------------------------------------------------|-----------------------------|-------------------------------------------|-------------------------------------------|
| RNA Copy number                                      | M93sm                       | $4.17 \times 10^4 (\pm 4.01 \times 10^3)$ | $1.71 \times 10^4 (\pm 1.23 \times 10^3)$ |
|                                                      | <i>hns</i> -                | $5.35 \times 10^4 (\pm 9.58 \times 10^3)$ | $2.44 \times 10^4 (\pm 3.10 \times 10^3)$ |
|                                                      | <i>hns</i> +                | $3.89 \times 10^3 (\pm 5.19 \times 10^2)$ | $1.59 \times 10^3 (\pm 18)$               |
|                                                      | <i>hlyU</i> -               | $9.54 \times 10^3 (\pm 5.96 \times 10^2)$ | $3.62 \times 10^3 (\pm 1.41 \times 10^2)$ |
|                                                      | <i>hns</i> -/ <i>hlyU</i> - | $7.31 \times 10^4 (\pm 7.23 \times 10^3)$ | $3.56 \times 10^4 (\pm 7.66 \times 10^2)$ |
|                                                      | <i>hns</i> -/ <i>hlyU</i> + | $2.92 \times 10^4 (\pm 8.00 \times 10^3)$ | $1.85 \times 10^4 (\pm 2.48 \times 10^3)$ |
|                                                      | <i>hns</i> +/ <i>hlyU</i> - | $1.14 \times 10^4 (\pm 1.42 \times 10^3)$ | $1.47 \times 10^4 (\pm 5.74 \times 10^2)$ |
| Relative change (fold) to M93Sm <sup>d</sup>         | M93Sm                       | 1.00 ( $\pm 0.10$ )                       | 1.00 ( $\pm 0.07$ )                       |
|                                                      | <i>hns</i> -                | 1.28 ( $\pm 0.23$ )                       | 1.43 ( $\pm 0.18$ )                       |
|                                                      | <i>hns</i> +                | -10.72 ( $\pm 0.01$ )                     | -10.77 ( $\pm 0.00$ )                     |
|                                                      | <i>hlyU</i> -               | -4.37 ( $\pm 0.01$ )                      | -4.73 ( $\pm 0.01$ )                      |
| Relative change (fold) to <i>hlyU</i> - <sup>d</sup> | <i>hlyU</i> -               | 1.00 ( $\pm 0.06$ )                       | 1.00 ( $\pm 0.04$ )                       |
|                                                      | <i>hns</i> -/ <i>hlyU</i> - | 7.67 ( $\pm 0.76$ )                       | 9.84 ( $\pm 0.21$ )                       |
|                                                      | <i>hns</i> +/ <i>hlyU</i> - | 1.20 ( $\pm 0.15$ )                       | 4.06 ( $\pm 0.16$ )                       |
| Relative change (fold) to <i>hns</i> - <sup>d</sup>  | <i>hns</i> -                | 1.00 ( $\pm 0.18$ )                       | 1.00 ( $\pm 0.13$ )                       |
|                                                      | <i>hns</i> -/ <i>hlyU</i> - | 1.37 ( $\pm 0.14$ )                       | 1.46 ( $\pm 0.03$ )                       |
|                                                      | <i>hns</i> -/ <i>hlyU</i> + | -1.83 ( $\pm 0.15$ )                      | -1.32 ( $\pm 0.10$ )                      |

---

*vah1*

|                                                      |                             |                                           |                                           |
|------------------------------------------------------|-----------------------------|-------------------------------------------|-------------------------------------------|
| RNA Copy number                                      | M93sm                       | $1.40 \times 10^3 (\pm 1.76 \times 10^2)$ | $6.19 \times 10^2 (\pm 94)$               |
|                                                      | <i>hns</i> -                | $2.27 \times 10^4 (\pm 6.40 \times 10^3)$ | $1.24 \times 10^4 (\pm 2.69 \times 10^3)$ |
|                                                      | <i>hns</i> +                | $1.06 \times 10^3 (\pm 3.62 \times 10^2)$ | $1.88 \times 10^2 (\pm 17)$               |
|                                                      | <i>hlyU</i> -               | $3.24 \times 10^3 (\pm 1.94 \times 10^2)$ | $4.74 \times 10^2 (\pm 88)$               |
|                                                      | <i>hns</i> -/ <i>hlyU</i> - | $1.68 \times 10^4 (\pm 3.21 \times 10^3)$ | $1.95 \times 10^4 (\pm 2.90 \times 10^3)$ |
|                                                      | <i>hns</i> -/ <i>hlyU</i> + | $1.30 \times 10^4 (\pm 1.48 \times 10^2)$ | $3.04 \times 10^4 (\pm 1.93 \times 10^3)$ |
|                                                      | <i>hns</i> +/ <i>hlyU</i> - | $5.34 \times 10^3 (\pm 5.30 \times 10^2)$ | $6.45 \times 10^3 (\pm 4.17 \times 10^2)$ |
| Relative change (fold) to M93Sm <sup>d</sup>         | M93Sm                       | 1.00 ( $\pm 0.13$ )                       | 1.00 ( $\pm 0.15$ )                       |
|                                                      | <i>hns</i> -                | 16.21 ( $\pm 4.57$ )                      | 20.01 ( $\pm 4.35$ )                      |
|                                                      | <i>hns</i> +                | -1.32 ( $\pm 0.26$ )                      | -3.30 ( $\pm 0.03$ )                      |
|                                                      | <i>hlyU</i> -               | 2.31 ( $\pm 0.14$ )                       | -1.30 ( $\pm 0.14$ )                      |
| Relative change (fold) to <i>hlyU</i> - <sup>d</sup> | <i>hlyU</i> -               | 1.00 ( $\pm 0.06$ )                       | 1.00 ( $\pm 0.19$ )                       |
|                                                      | <i>hns</i> -/ <i>hlyU</i> - | 5.20 ( $\pm 0.99$ )                       | 41.02 ( $\pm 6.11$ )                      |
|                                                      | <i>hns</i> +/ <i>hlyU</i> - | 1.65 ( $\pm 0.16$ )                       | 13.60 ( $\pm 0.88$ )                      |
| Relative change (fold) to <i>hns</i> - <sup>d</sup>  | <i>hns</i> -                | 1.00 ( $\pm 0.28$ )                       | 1.00 ( $\pm 0.22$ )                       |
|                                                      | <i>hns</i> -/ <i>hlyU</i> - | -1.35 ( $\pm 0.14$ )                      | 1.57 ( $\pm 0.23$ )                       |
|                                                      | <i>hns</i> -/ <i>hlyU</i> + | -1.75 ( $\pm 0.01$ )                      | 2.46 ( $\pm 0.16$ )                       |

---

*plp*

|                 |               |                                           |                                           |
|-----------------|---------------|-------------------------------------------|-------------------------------------------|
| RNA Copy number | M93sm         | $8.50 \times 10^2 (\pm 2.07 \times 10^2)$ | $3.02 \times 10^2 (\pm 8)$                |
|                 | <i>hns</i> -  | $2.66 \times 10^4 (\pm 4.08 \times 10^3)$ | $1.11 \times 10^4 (\pm 2.43 \times 10^2)$ |
|                 | <i>hns</i> +  | $4.21 \times 10^2 (\pm 1.08 \times 10^2)$ | $3.18 \times 10^2 (\pm 73)$               |
|                 | <i>hlyU</i> - | $1.14 \times 10^3 (\pm 3.38 \times 10^2)$ | $3.46 \times 10^2 (\pm 50)$               |

|                                                     |                   |                                           |                                           |
|-----------------------------------------------------|-------------------|-------------------------------------------|-------------------------------------------|
|                                                     | <i>hns-/hlyU-</i> | $8.46 \times 10^3 (\pm 1.64 \times 10^3)$ | $1.18 \times 10^4 (\pm 2.15 \times 10^3)$ |
|                                                     | <i>hns-/hlyU+</i> | $8.58 \times 10^3 (\pm 8.21 \times 10^2)$ | $2.39 \times 10^4 (\pm 8.47 \times 10^2)$ |
|                                                     | <i>hns+/hlyU-</i> | $2.02 \times 10^3 (\pm 5.75 \times 10^2)$ | $3.58 \times 10^3 (\pm 1.54 \times 10^2)$ |
| Relative change (fold) to M93Sm <sup>d</sup>        | M93Sm             | 1.00 ( $\pm 0.24$ )                       | 1.00 ( $\pm 0.03$ )                       |
|                                                     | <i>hns-</i>       | 31.27 ( $\pm 4.80$ )                      | 36.88 ( $\pm 0.81$ )                      |
|                                                     | <i>hns+</i>       | -2.02 ( $\pm 0.13$ )                      | 1.05 ( $\pm 0.24$ )                       |
|                                                     | <i>hlyU-</i>      | 1.34 ( $\pm 0.40$ )                       | 1.15 ( $\pm 0.17$ )                       |
| Relative change (fold) to <i>hlyU-</i> <sup>d</sup> | <i>hlyU-</i>      | 1.00 ( $\pm 0.30$ )                       | 1.00 ( $\pm 0.15$ )                       |
|                                                     | <i>hns-/hlyU-</i> | 7.46 ( $\pm 1.44$ )                       | 34.02 ( $\pm 6.21$ )                      |
|                                                     | <i>hns+/hlyU-</i> | 1.78 ( $\pm 0.51$ )                       | 10.35 ( $\pm 0.44$ )                      |
| Relative change (fold) to <i>hns-</i> <sup>d</sup>  | <i>hns-</i>       | 1.00 ( $\pm 0.15$ )                       | 1.00 ( $\pm 0.02$ )                       |
|                                                     | <i>hns-/hlyU-</i> | -3.14 ( $\pm 0.06$ )                      | 1.06 ( $\pm 0.19$ )                       |
|                                                     | <i>hns-/hlyU+</i> | -3.10 ( $\pm 0.03$ )                      | 2.15 ( $\pm 0.08$ )                       |

<sup>a</sup> The data presented is a representative experiment of two independent experiments. Each sample is the average of three replicates.

<sup>b</sup> *V. anguillarum* strains: M93Sm (wild type), *hns-* (*hns* mutant, M114), *hns+* (*hns* complemente, M116), *hlyU-* (*hlyU* mutant, S305), *hns-/hlyU-* (*hns/hlyU* double mutant, ES114), *hns-/hlyU+* (*hns/hlyU* double mutant with *hlyU* complemented, ES115), *hns+/hlyU-* (*hns/hlyU* double mutant with *hns* complemented, ES116)

<sup>c</sup> Standard Deviation

<sup>d</sup> Gene expression is up-regulated (positive number) or down-regulated (negative number) compared to expression in M93Sm.

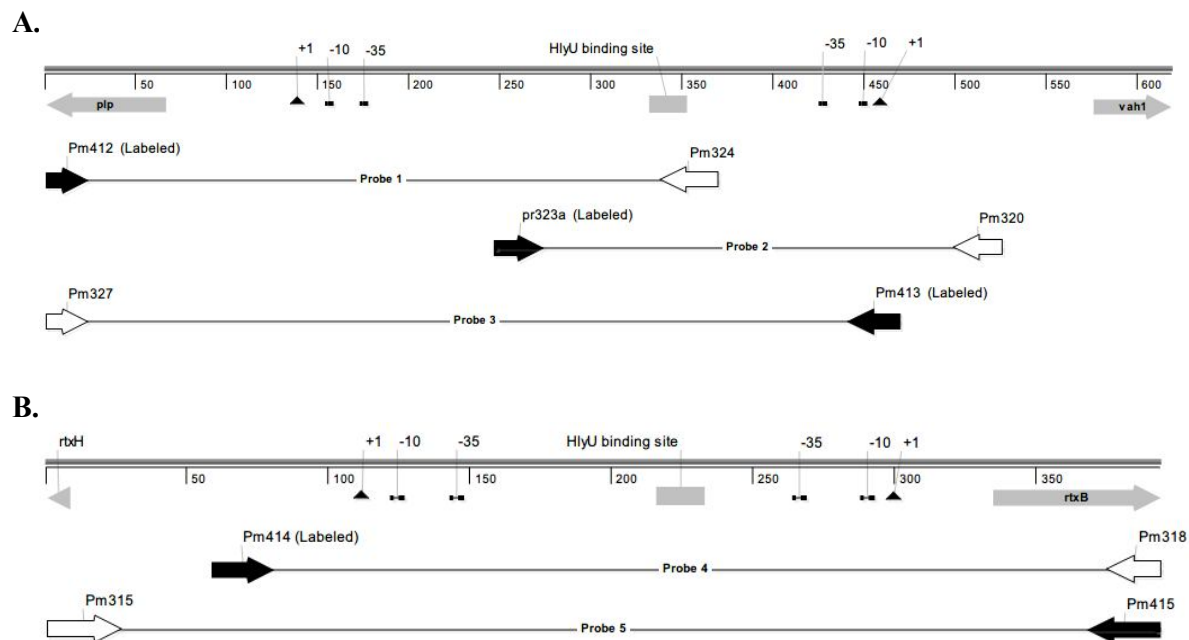

**Figure S1.** 6-FAM labeled DNA probes (probes 1-5) used for DNaseI protection studies of the intergenic regions between **A)** *plp* and *vah1* and **B)** *rtxH* and *rtxB* were obtained by PCR amplification using the primers in Table 2.

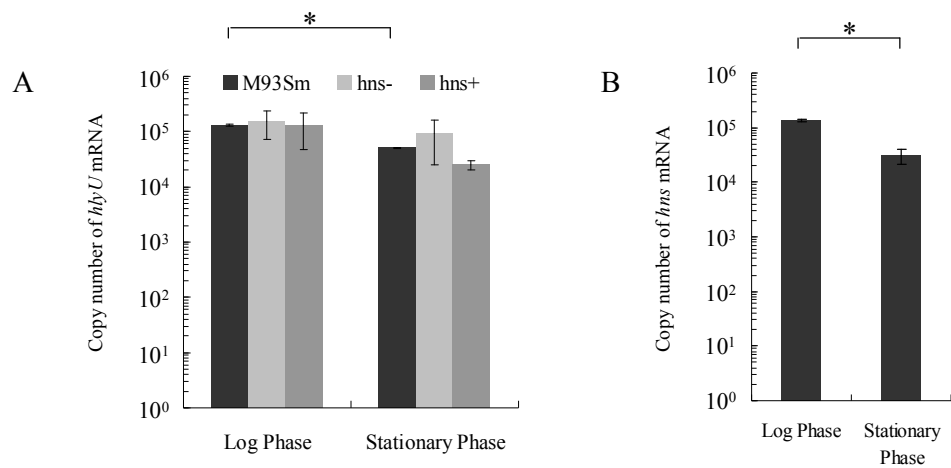

**Figure S2.** Real-time qRT-PCR was performed to determine **A)** the expression level of *hlyU* in the wild-type strain (M93Sm), *hns* mutant (*hns*<sup>-</sup>), and the *hns* complement (*hns*<sup>+</sup>) during exponential and stationary growth phases. Each sample is the average of three replicates. The data presented are the averages of two independent experiments. **B)** Expression level of *hns* in the wild-type strain (M93Sm) during exponential and stationary growth phases. Each sample is the average of three replicates. Statistically significant differences between samples are marked with a bracket and an \* symbol. Error bars represent 1 standard deviation.

A.

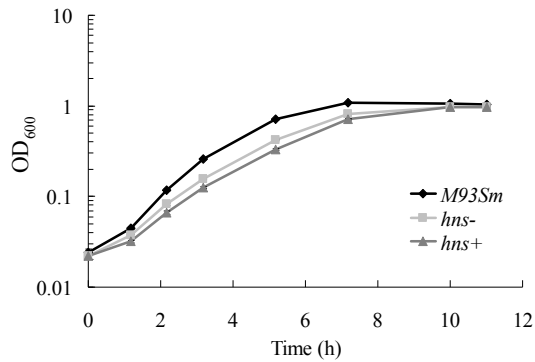

B.

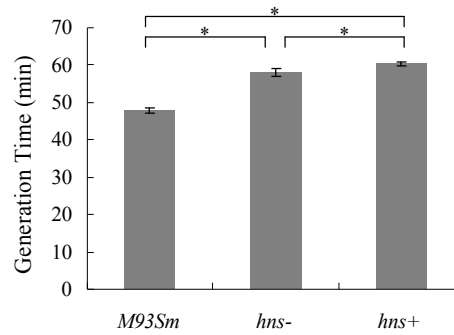

**Figure S3. A)** Growth curve of *V. anguillarum* wild type (M93Sm), *hns* mutant (*hns*-) and *hns* complemented (*hns*+) strains in LB20. **B)** Generation time of *V. anguillarum* wild type (M93Sm), *hns* mutant (*hns*-) and *hns* complemented (*hns*+) strains grown in LB20. Statistically significant differences between samples are marked with a bracket and an \* symbol. Error bars represent 1 standard deviation.
